# Supplementary material for: Phenotypic and genotypic characterization of families with complex intellectual disability identified pathogenic genetic variations in known and novel disease genes
Source: PubMed Central journal article supplement (PMC6976666; doi:10.1038/s41598-020-57929-4), 2020-01-22

**Supplementary Material: Original Western Blot Images From Figure 4B**

**Article Title:** Phenotypic and genotypic characterization of families with complex intellectual disability identified pathogenic genetic variations in known and novel disease genes

**Authors:** Hossein Darvish, Luis J. Azcona, Abbas Tafakhori, Roxana Mesias, Elena Sanchez, Elham Alehabib, Azadeh Ahmadifard, Arman Habibi, Amir Hossein Johari, Babak Emamalizadeh, Faezeh Jamali, Marjan Chapi, Javad Jamshidi, Yuji Kajiwara, Coro Paisán-Ruiz

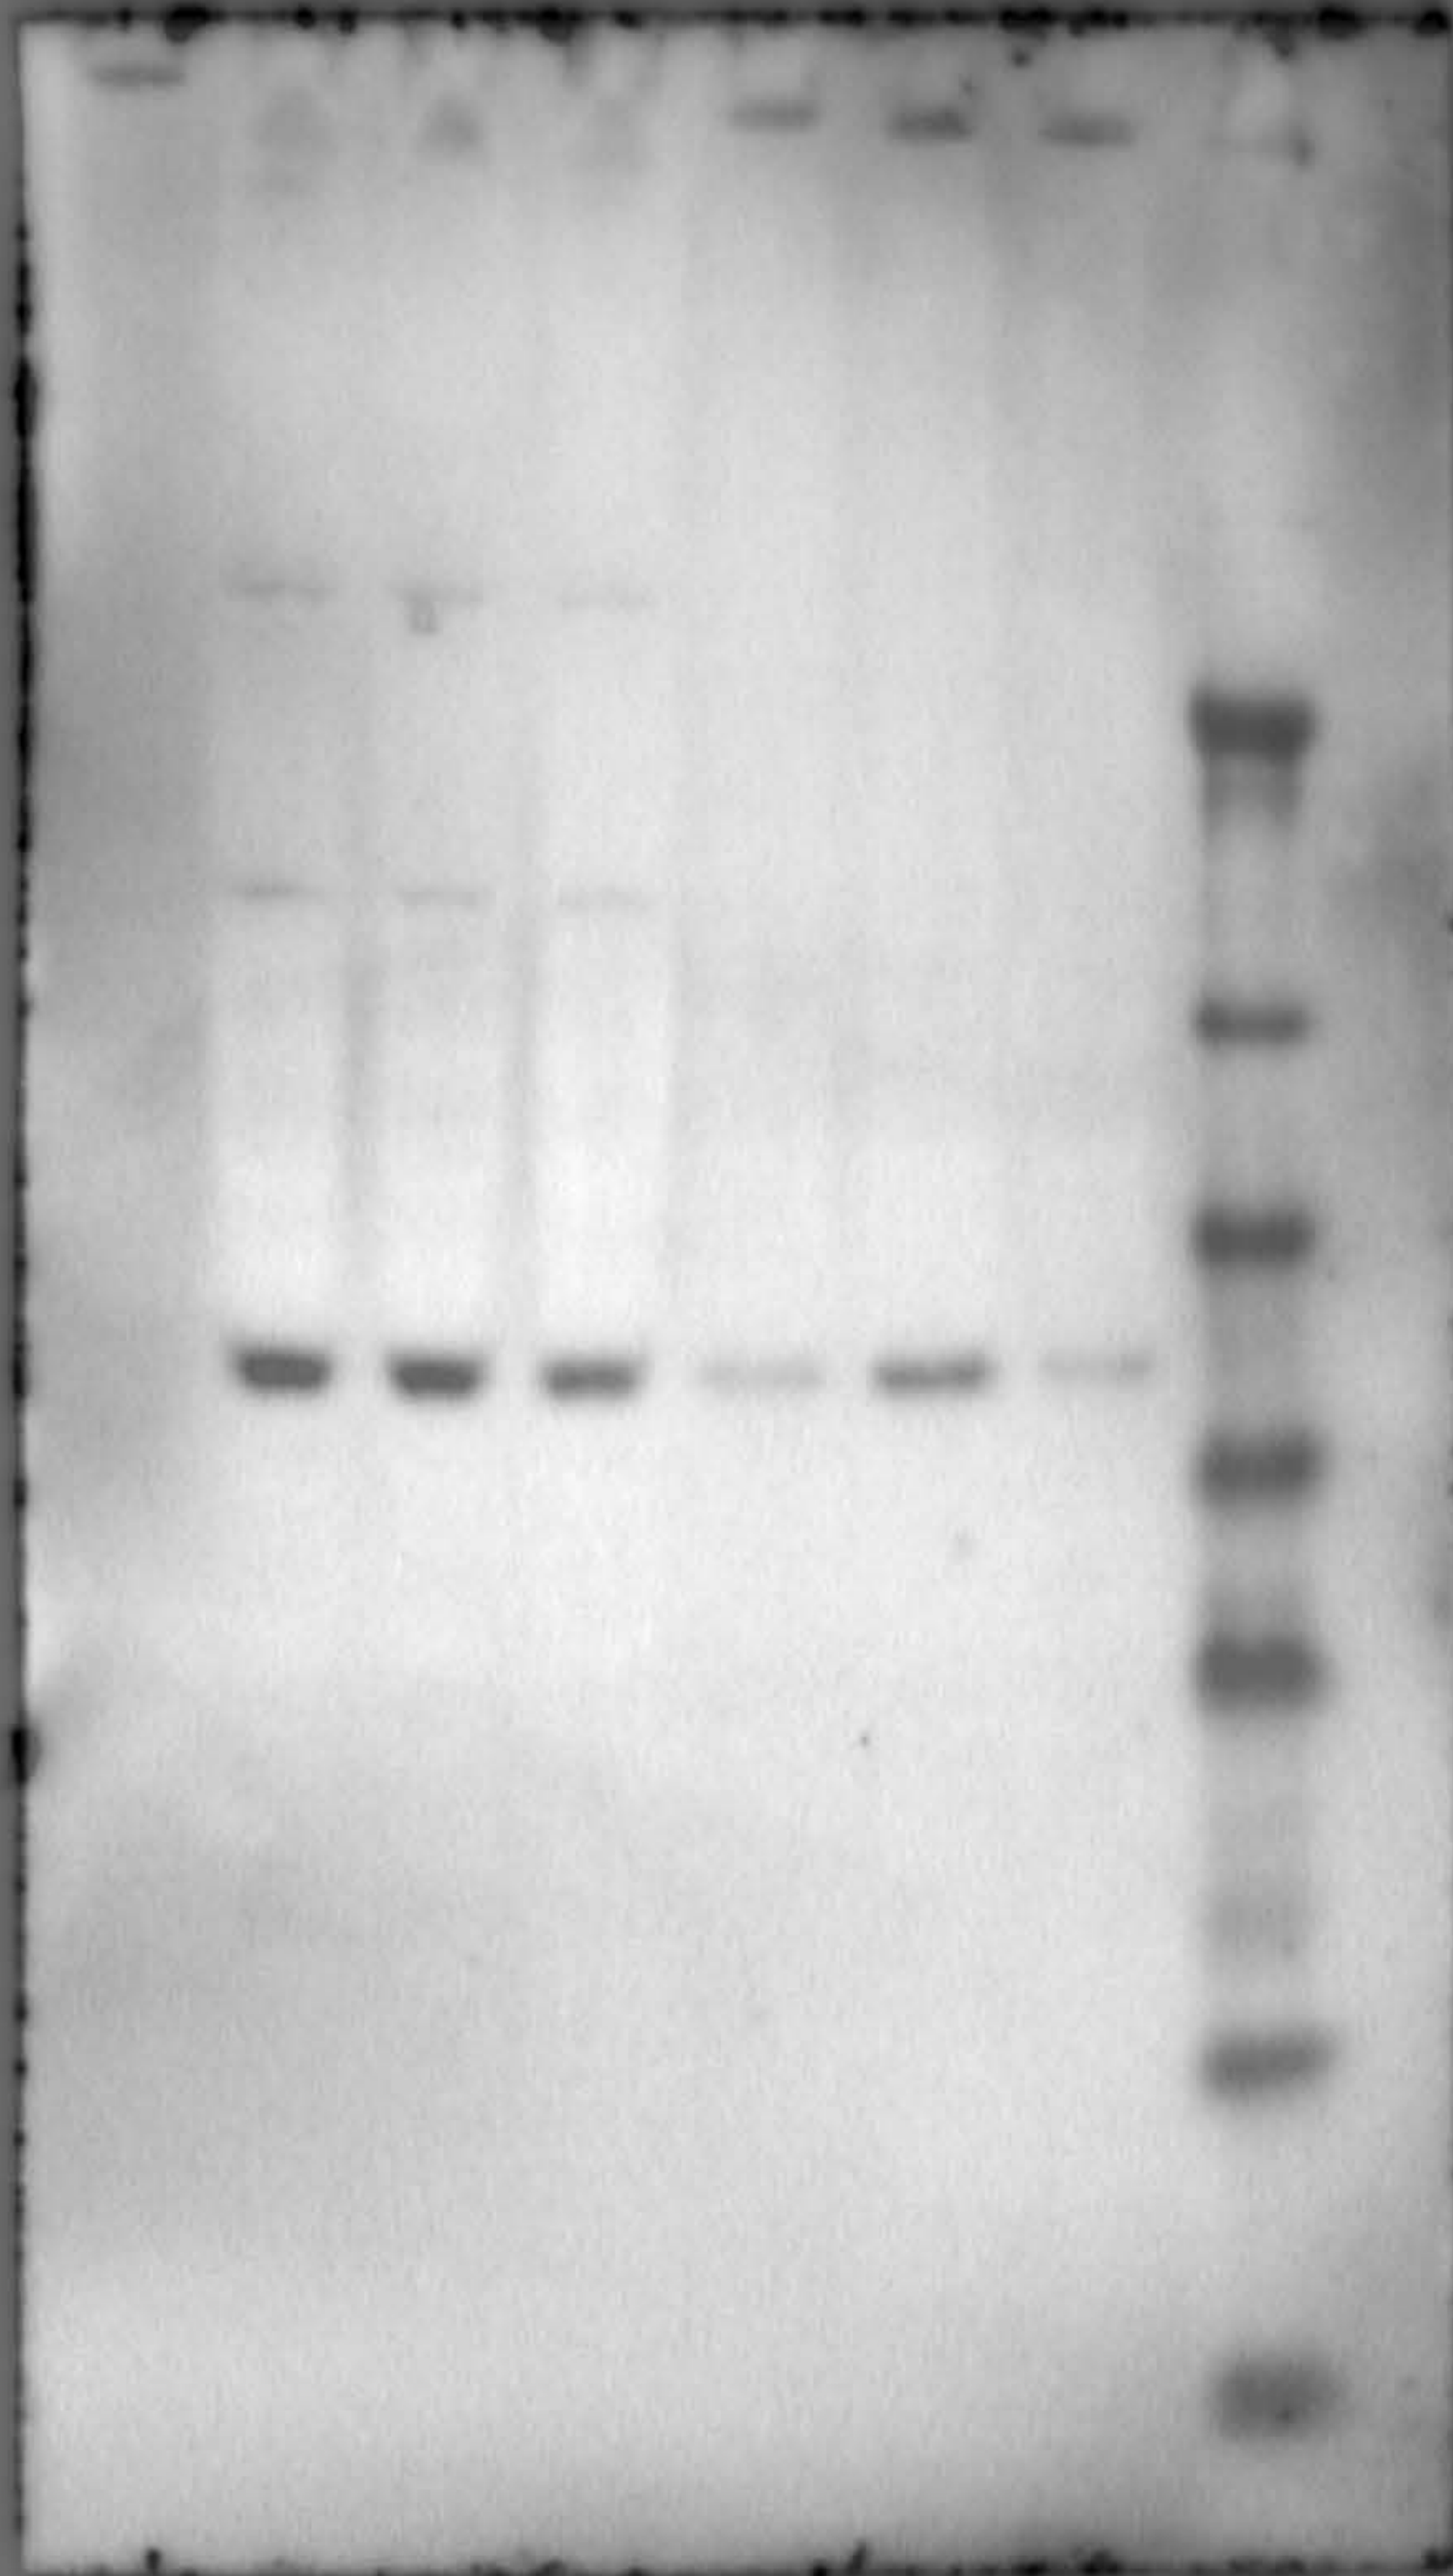

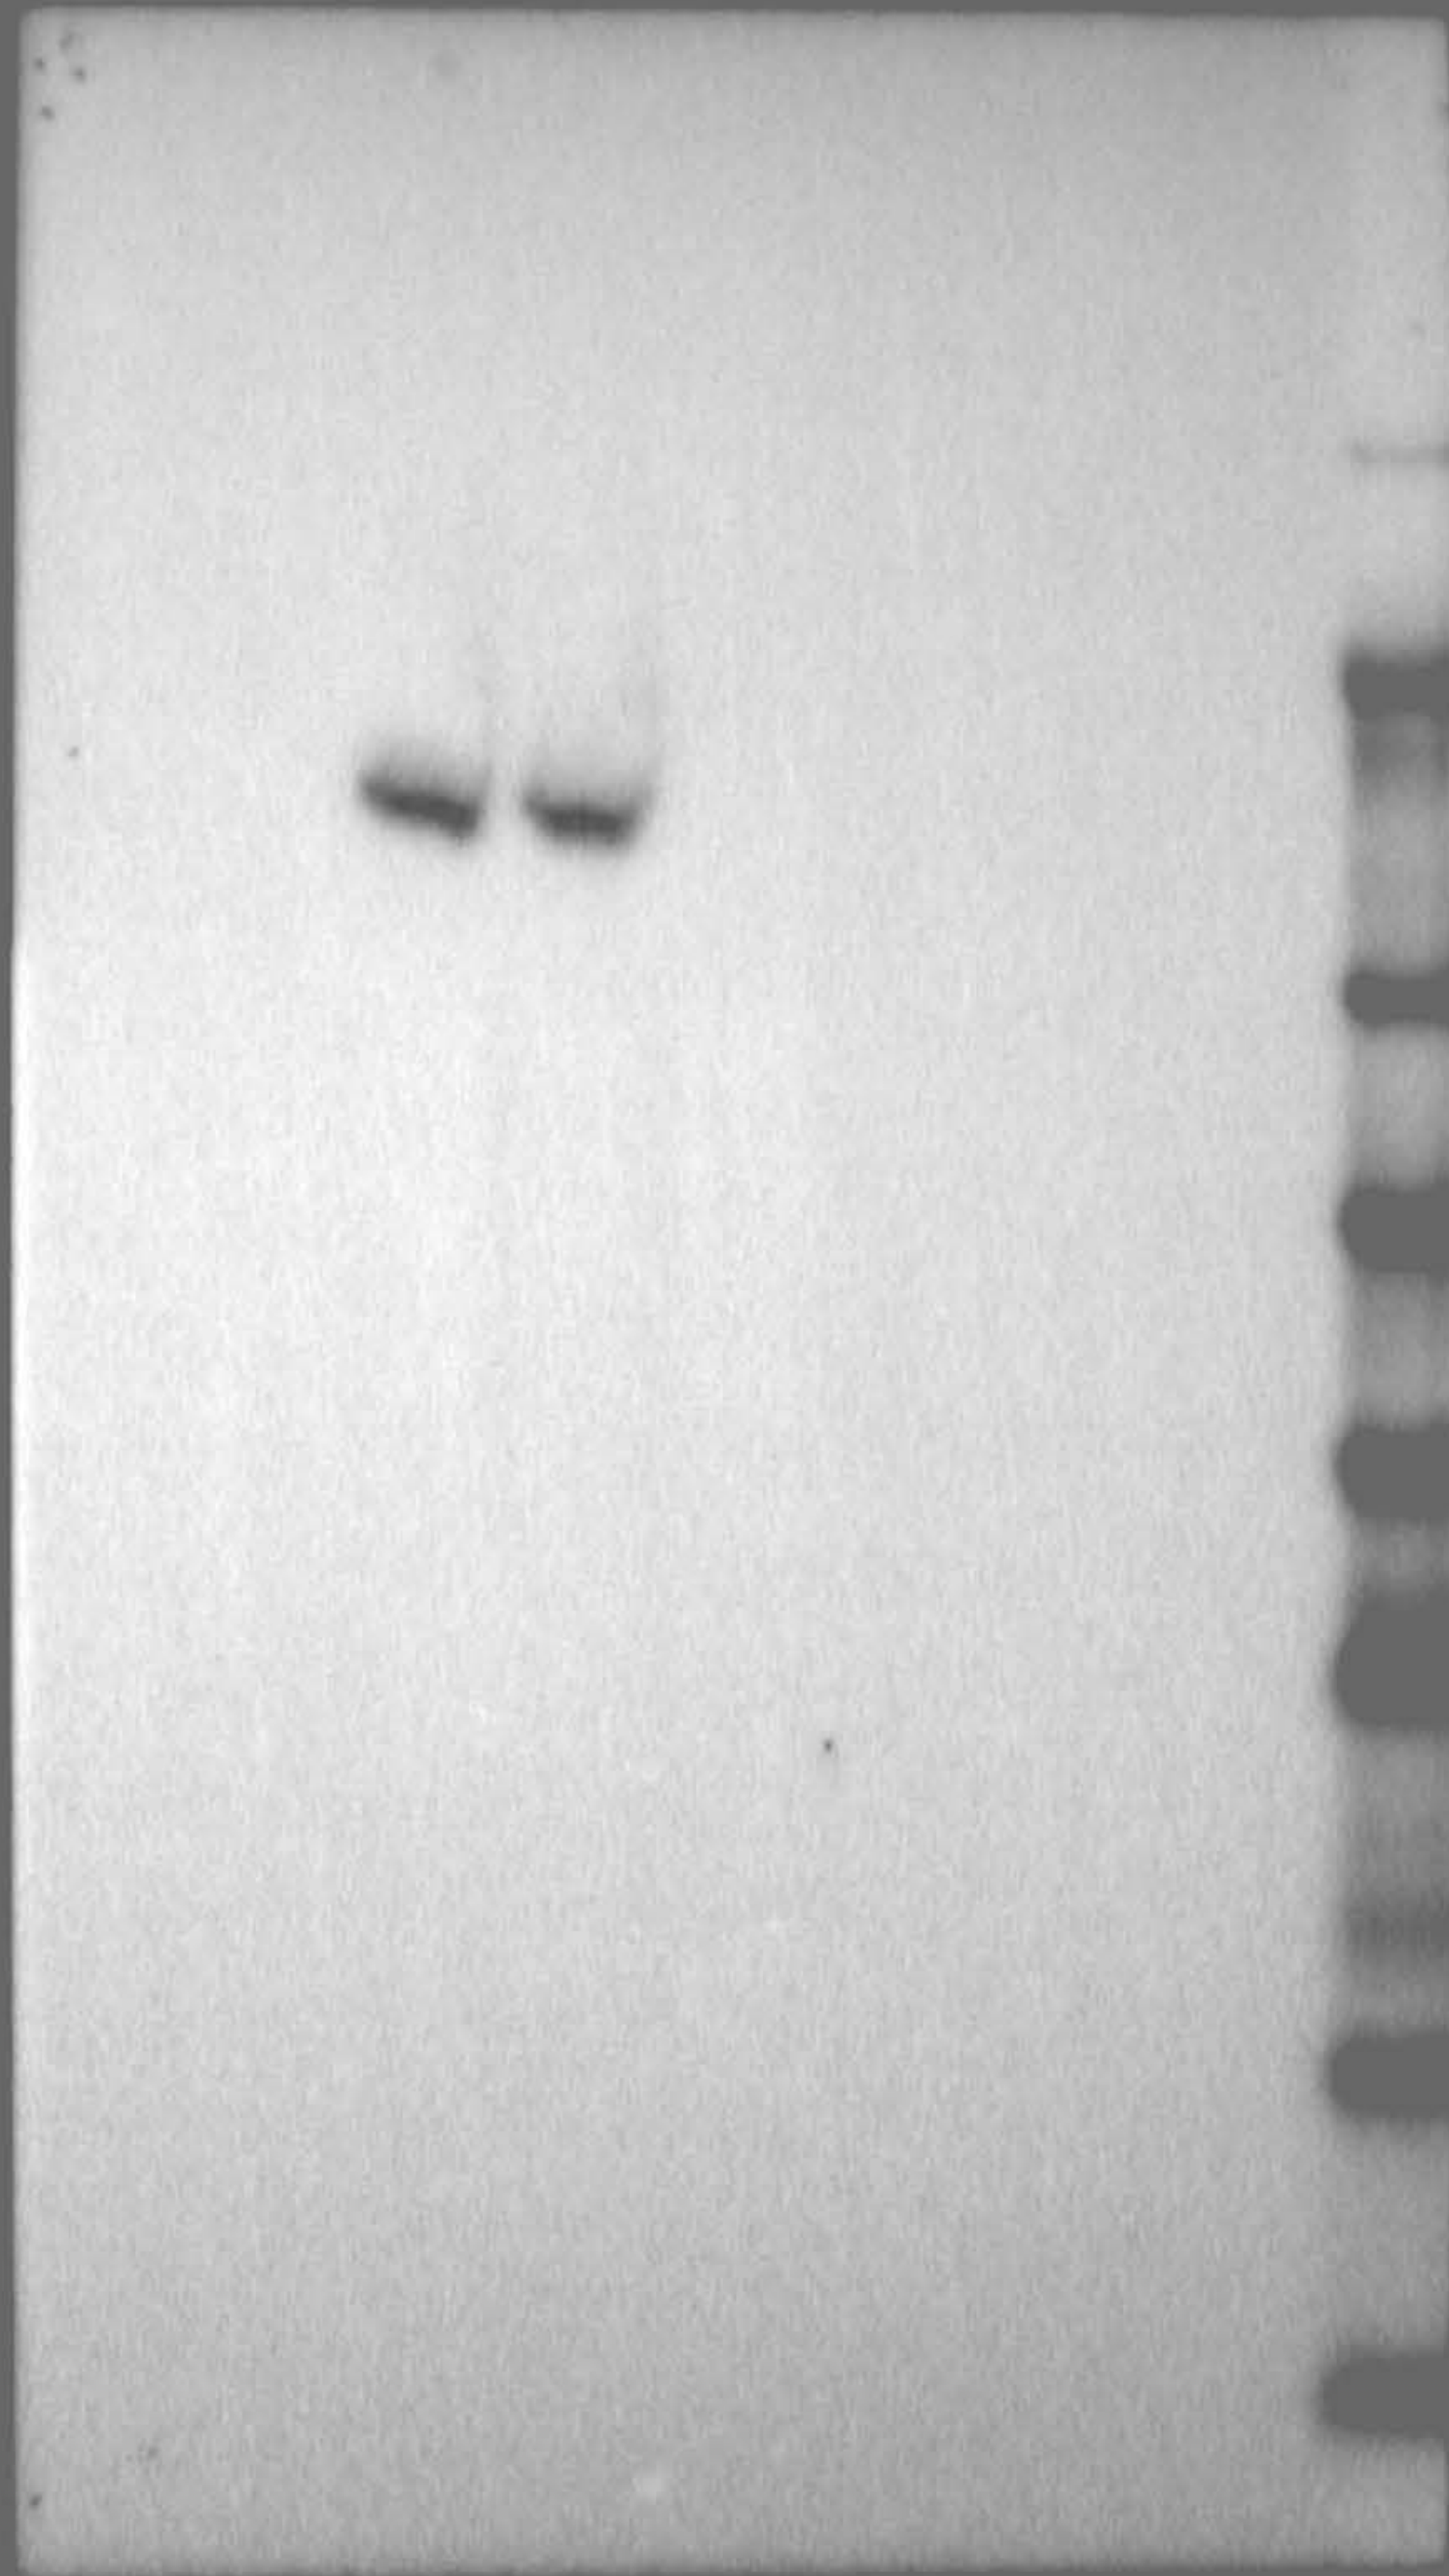

Supplement: 41598_2020_57929_MOESM1_ESM.pdf [file 41598_2020_57929_MOESM1_ESM.pdf]
